# Supplementary material for: Enzymatic electrochemiluminescence sensor based on a ternary luminol–H2O2-confined nanocatalyst system for sensitive determination of uric acid
Source: Royal Society of Chemistry journal article supplement (doi:10.1039/d6ra02118b), 2026-05-22
Supplement: d6ra02118b1.pdf [file d6ra02118b1.pdf]

## TABLES

**Table S1** UA detection performance by different electrochemical methods.

| Electrode                                    | Method | Linear range ( $\mu\text{M}$ )             | LOD (nM) | Ref.      |
|----------------------------------------------|--------|--------------------------------------------|----------|-----------|
| P-EPPGE                                      | EC     | 0.1–25                                     | 30       | 1         |
| Co-CeO <sub>2</sub> /GCE                     | EC     | 1–2200                                     | 120      | 2         |
| rGO/PPy-PtNPs/GCE                            | EC     | 100–350                                    | 160      | 3         |
| MoO <sub>3</sub> @B/N-PC/GCE                 | EC     | 0.086–102.5                                | 78       | 4         |
| PtNPs/rGO/GCE                                | EC     | 10–200                                     | 741      | 5         |
| luminol-TMB/SPE                              | ECL    | 1.5–100                                    | 440      | 6         |
| Uox/PtNPs-NGQDs@GA/NH <sub>2</sub> -VMSF/ITO | ECL    | 0.01–1 $\mu\text{M}$<br>1–50 $\mu\text{M}$ | 8.1      | This work |

P-EPPGE: pre-anodized edge plane pyrolytic graphite electrode; EC: electrochemical method; Co-CeO<sub>2</sub>: Co doped CeO<sub>2</sub>; GCE: glassy carbon electrode; rGO: reduced graphene oxide; PPy: polypyrrole; B/N-PC: B/N doped porous carbon; SPE, screen printed electrode.

## FIGURES

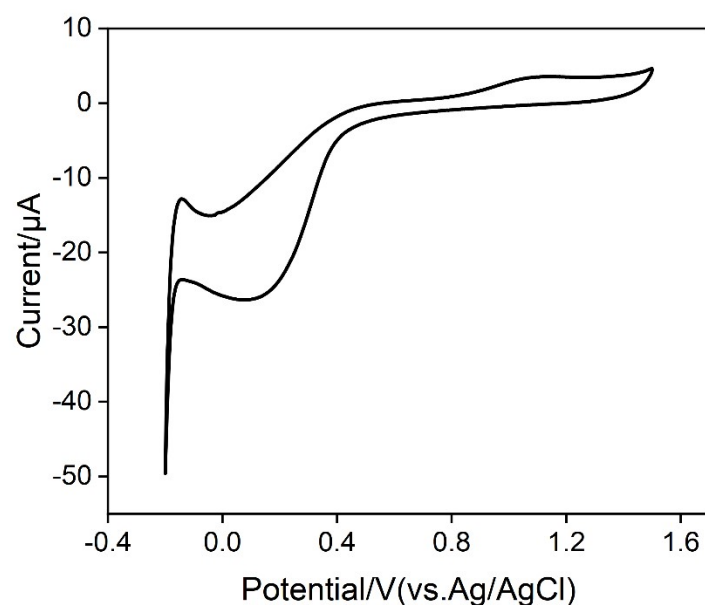

Figure S1 CV curve of the PtNPs-NGQDs@NH<sub>2</sub>-VMSF/ITO electrode in sulfuric acid (0.5M) after 7 days of storage.

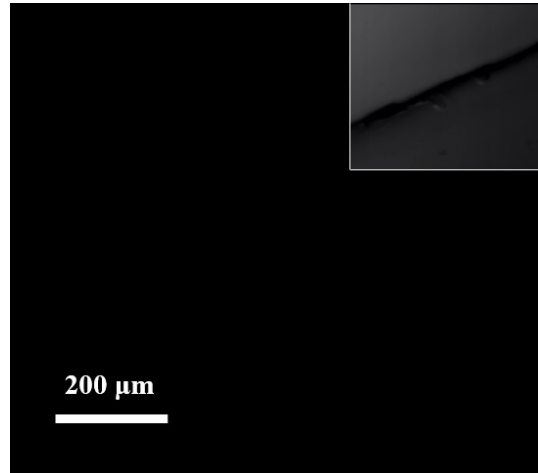

Figure S2 CLSM images of  $\text{NH}_2\text{-VMSF/ITO}$  electrode after immerse in NGQDs solution followed by rinse under bright-field (inset) and dark-field condition with excitation at 488 nm.

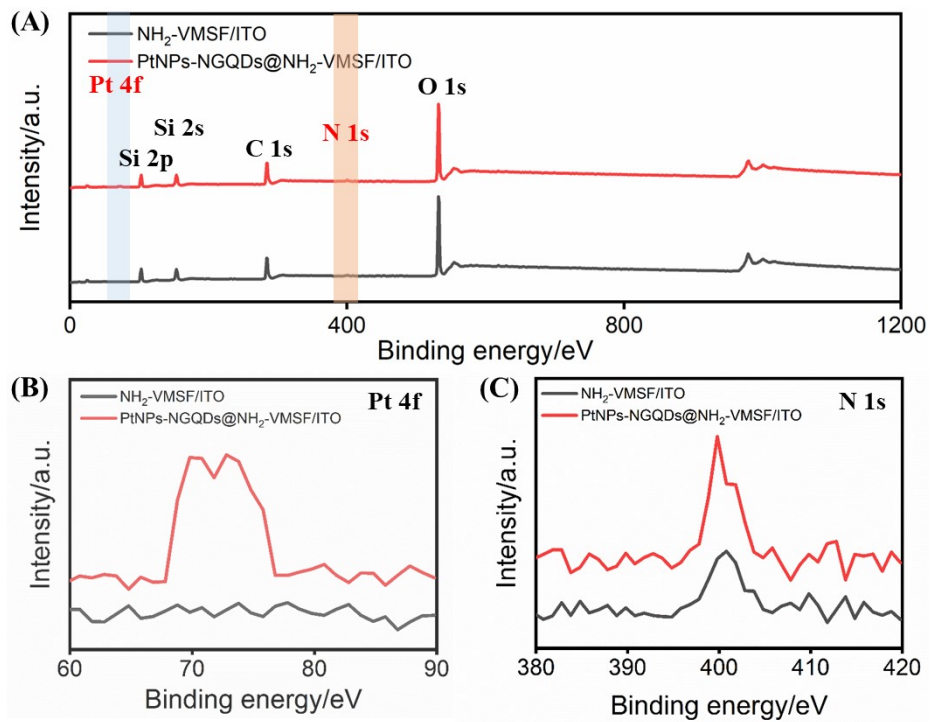

Figure S3 (A) XPS survey spectra of  $\text{NH}_2\text{-VMSF/ITO}$  and  $\text{PtNPs-NGQDs@NH}_2\text{-VMSF/ITO}$ . (B-C) High-resolution Pt4f (B) and N1s (C) spectra of  $\text{PtNPs-NGQDs@NH}_2\text{-VMSF/ITO}$ .

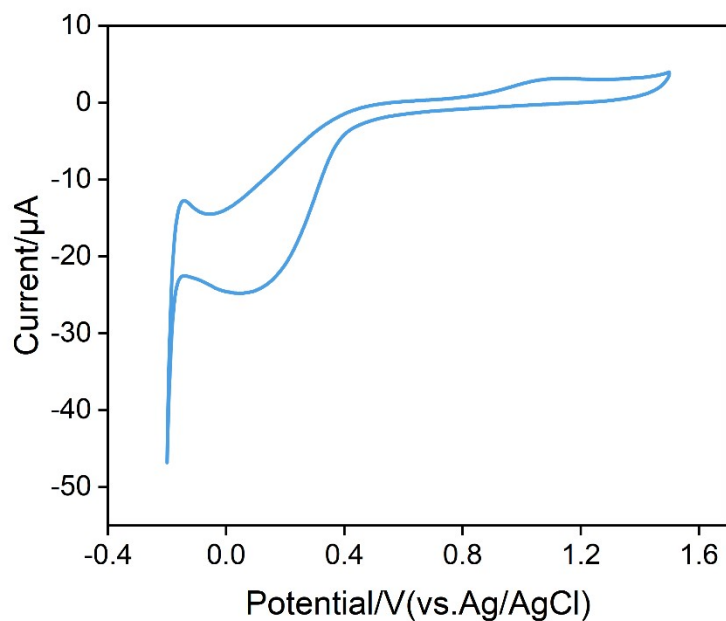

Figure S4 CV curve of the PtNPs-NGQDs@NH<sub>2</sub>-VMSF/ITO electrode in sulfuric acid (0.5M) after 7 days of storage

## References

1. G. D. Pierini, S. N. Robledo, M. A. Zon, M. S. Di Nezio, A. M. Granero and H. Fernández, *Microchemical Journal*, 2018, **138**, 58-64.
2. N. Lavanya, C. Sekar, R. Murugan and G. Ravi, *Materials Science and Engineering C*, 2016, **65**, 278-286.
3. R. Darabi, H. Karimi-Maleh, M. Akin, K. Arikan, Z. Zhang, R. Bayat, M. Bekmezci and F. Sen, *Electrochimica Acta*, 2023, **457**, 142402.
4. D. Zhu, X. Bai, P. Zhang and X. Li, *Colloids and Surfaces A: Physicochemical and Engineering Aspects*, 2022, **655**, 130304.
5. D. E. Oh, C. S. Lee and T. H. Kim, *Talanta*, 2022, **247**, 123590.
6. J. Ballesta-Claver, I. F. Diaz Ortega, M. C. Valencia-Miron and L. F. Capitan-Vallvey, *Analytica Chimica Acta*, 2011, **702**, 254-261.
